# Supplementary material
Source: Springer Nature journal article supplement (https://www.springermedizin.de/resource/supplementary/12877_2009_320_MOESM4_ESM.pdf/9439382)

Cumulative incidence of fracture

10%  
5%  
0%

0 1 2 3 4 5

Follow up years

T3 (confirmed)

T1 (unconfirmed)

T2 (moderately confirmed)

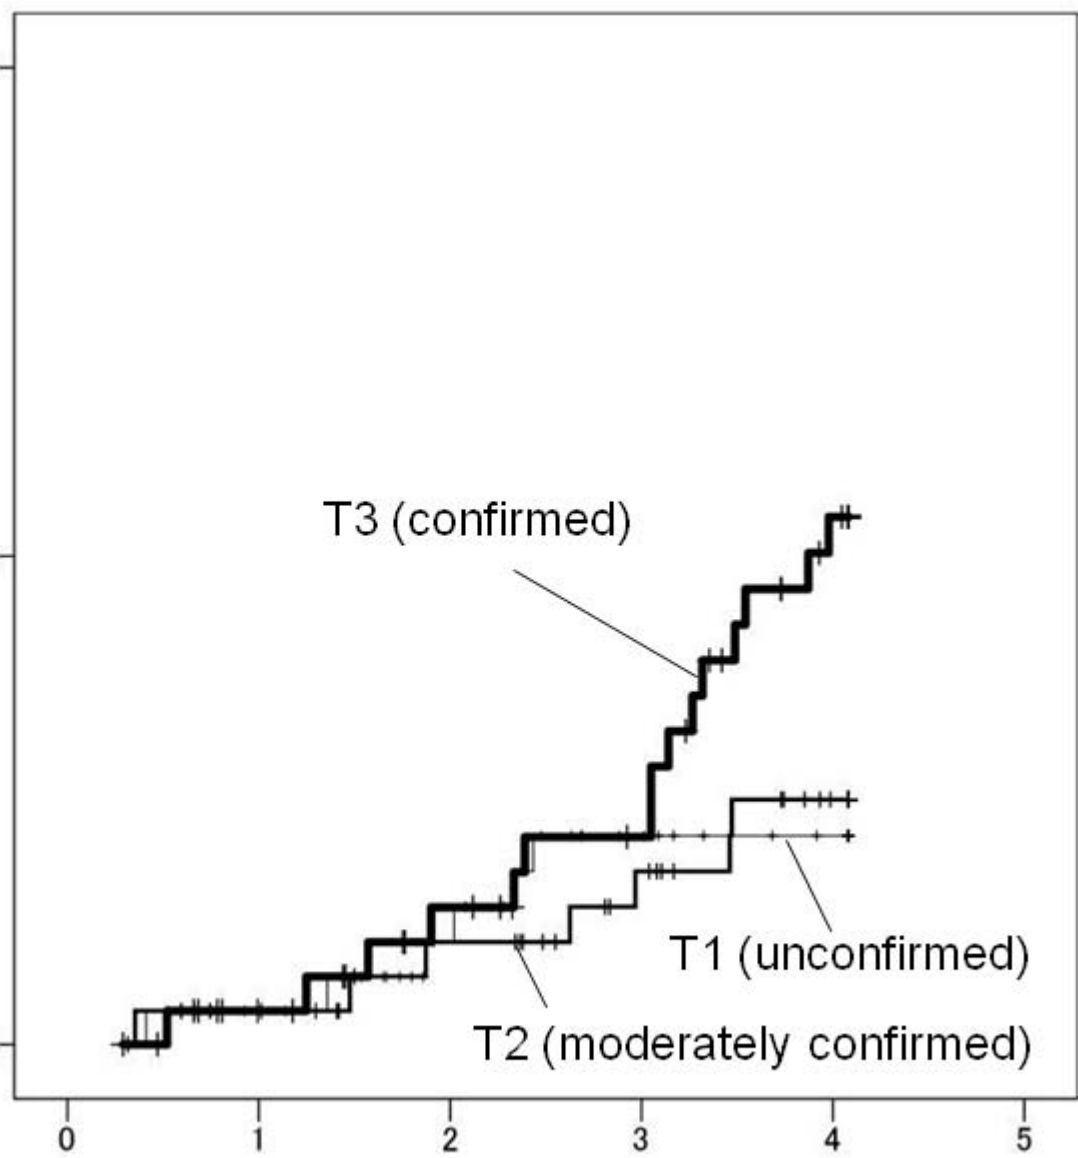

Supplement: MOESM4 [file 9439382]
